# Supplementary material for: Cryo-EM structures and functional characterization of murine Slc26a9 reveal mechanism of uncoupled chloride transport
Source: PubMed Central journal article supplement (PMC6656431; doi:10.7554/elife.46986), 2019-07-24
Supplement: elife-46986-transrepform.pdf [file elife-46986-transrepform.pdf]

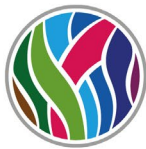

## eLife's transparent reporting form

We encourage authors to provide detailed information *within their submission* to facilitate the interpretation and replication of experiments. Authors can upload supporting documentation to indicate the use of appropriate reporting guidelines for health-related research (see [EQUATOR Network](#)), life science research (see the [BioSharing Information Resource](#)), or the [ARRIVE guidelines](#) for reporting work involving animal research. Where applicable, authors should refer to any relevant reporting standards documents in this form.

If you have any questions, please consult our Journal Policies and/or contact us: [editorial@elifesciences.org](mailto:editorial@elifesciences.org).

### Sample-size estimation

- You should state whether an appropriate sample size was computed when the study was being designed
- You should state the statistical method of sample size computation and any required assumptions
- If no explicit power analysis was used, you should describe how you decided what sample (replicate) size (number) to use

Please outline where this information can be found within the submission (e.g., sections or figure legends), or explain why this information doesn't apply to your submission:

- Electrophysiological measurements were repeated to the extent that additional replicates did not substantially alter the average values. The number of biological replicates ranged from 3–10, as indicated in figure legends. Errors are shown as s.e.m. for the indicated number of replicates in Figure 1C–F; Figure 1—Figure Supplement 2B, D,H; Figure 1—Figure Supplement 3A–F; Figure 6C; Figure 6—Figure Supplement 1A,C; Figure 7B–H; Figure 7—Figure Supplement 1A–H; Figure 7—Figure Supplement 2; Figure 7—Figure Supplement 3.
- For the proteo-liposome data in Figure 1A and Figure 1—Figure Supplement 1D, data from 3 technical replicates are shown for a single representative proteo-liposome reconstitution batch. Numerous reconstitution trials using separate batches of purified protein and synthetic lipid lots resulted in similar data
- The sample size for cryo-EM analysis was chosen to obtain the best possible resolution for each dataset. The detailed procedure is outlined in materials and methods section on cryo-EM data collection and image processing

### Replicates

- You should report how often each experiment was performed
- You should include a definition of biological versus technical replication
- The data obtained should be provided and sufficient information should be provided to indicate the number of independent biological and/or technical replicates
- If you encountered any outliers, you should describe how these were handled
- Criteria for exclusion/inclusion of data should be clearly stated

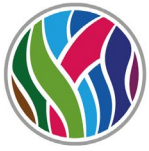

- High-throughput sequence data should be uploaded before submission, with a private link for reviewers provided (these are available from both GEO and ArrayExpress)

Please outline where this information can be found within the submission (e.g., sections or figure legends), or explain why this information doesn't apply to your submission:

- Number and type of replicates are indicated in each respective figure legend panel.
- For electrophysiology experiments, all replicates are biological, meaning that each data subset was acquired from a unique transfected cell
- For proteo-liposome experiments, the three technical replicates refer to three separate samples prepared and analyzed separately from a single batch of reconstituted proteo-liposomes
- No obvious outliers related to the behavior of independent cells or protein constructs were encountered or omitted from presented data. Only outliers resulting from technical complications, such as leaky membrane seals in electrophysiological recordings, were discarded.
- Presented data is in accordance with eLife's regulations and appropriate information regarding the number and type of replicates is provided in figure legends

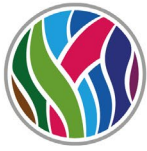

### Statistical reporting

- Statistical analysis methods should be described and justified
- Raw data should be presented in figures whenever informative to do so (typically when N per group is less than 10)
- For each experiment, you should identify the statistical tests used, exact values of N, definitions of center, methods of multiple test correction, and dispersion and precision measures (e.g., mean, median, SD, SEM, confidence intervals; and, for the major substantive results, a measure of effect size (e.g., Pearson's r, Cohen's d)
- Report exact p-values wherever possible alongside the summary statistics and 95% confidence intervals. These should be reported for all key questions and not only when the p-value is less than 0.05.

Please outline where this information can be found within the submission (e.g., sections or figure legends), or explain why this information doesn't apply to your submission:

- For cryo EM maps, the resolution was estimated the gold-standard Fourier shell correlation between two independently refined half-maps. For details, see materials and methods.

(For large datasets, or papers with a very large number of statistical tests, you may upload a single table file with tests, Ns, etc., with reference to sections in the manuscript.)

### Group allocation

- Indicate how samples were allocated into experimental groups (in the case of clinical studies, please specify allocation to treatment method); if randomization was used, please also state if restricted randomization was applied
- Indicate if masking was used during group allocation, data collection and/or data analysis

Please outline where this information can be found within the submission (e.g., sections or figure legends), or explain why this information doesn't apply to your submission:

N/A

### Additional data files ("source data")

- We encourage you to upload relevant additional data files, such as numerical data that are represented as a graph in a figure, or as a summary table
- Where provided, these should be in the most useful format, and they can be uploaded as "Source data" files linked to a main figure or table
- Include model definition files including the full list of parameters used
- Include code used for data analysis (e.g., R, MatLab)
- Avoid stating that data files are "available upon request"

Please indicate the figures or tables for which source data files have been provided:

No numerical data have been provided.
